# Supplementary material
Source: publisher site journal article supplement (https://arthropod-systematics.arphahub.com/article/64252/download/suppl/31/)
Supplement: Supplementary file 1

Figure S1. Morphometric measurements.

|                                                                                     |                                                                                      |                                                                                       |
|-------------------------------------------------------------------------------------|--------------------------------------------------------------------------------------|---------------------------------------------------------------------------------------|
| 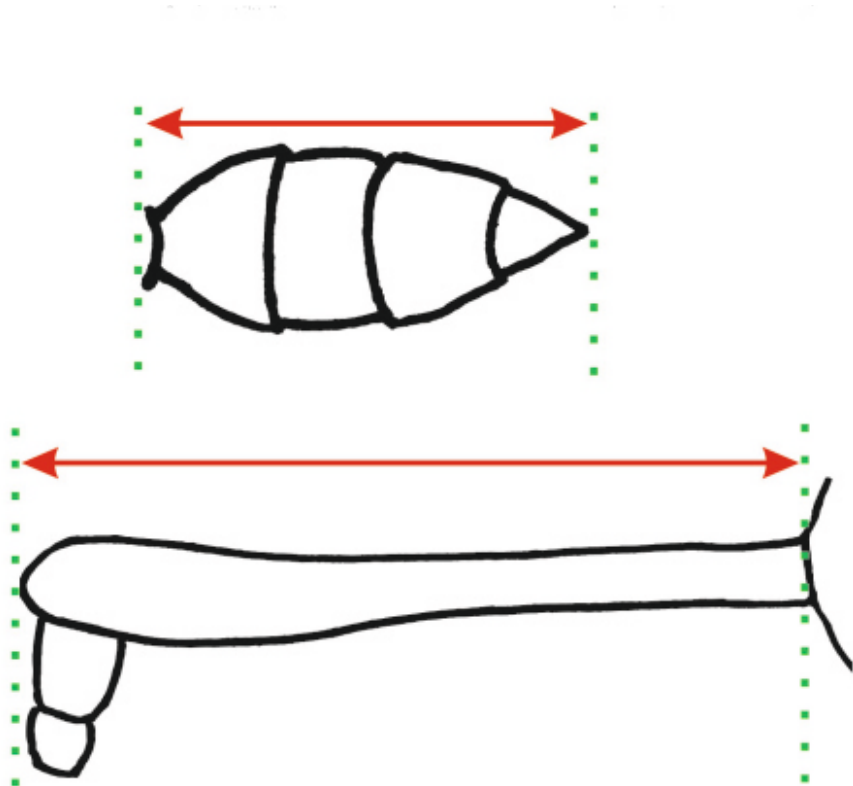   |    |    |
| Measurements of antennae (club and scape length).                                   | Measurements of head (rostrum breadth, head breadth, distance between eyes).         | Measurement of tibia (length).                                                        |
|  |  |  |
| Measurements of elytron (length and breadth).                                       | Measurements of spermatheca (length and breadth).                                    | Measurements of abdomen (length and breadth).                                         |
|  |  |  |
| Measurements of pronotum (length and breadth).                                      | Measurements of abdomen - ventral side (distance between 2nd and 3rd legs pair).     | Measurements of femur (length).                                                       |
